# Supplementary material for: Electronic Structure of C60/Zinc Phthalocyanine/V2O5 Interfaces Studied Using Photoemission Spectroscopy for Organic Photovoltaic Applications
Source: MDPI journal article supplement (doi:10.3390/molecules23020449), 2018-02-18
Supplement: s1 [file s1]

**Supporting Information for:**

**Electronic structure of  $C_{60}$ /zinc phthalocyanine/ $V_2O_5$  interfaces studied using photoemission spectroscopy for organic photovoltaic applications**

Chang Jin Lim<sup>a</sup>, Min Gyu Park<sup>a</sup>, Min Su Kim<sup>b</sup>, Jeong Hwa Han<sup>b</sup>, Soohaeng Cho<sup>a</sup>, Mann-Ho Cho<sup>b</sup>, Yeonjin Yi<sup>b</sup>, Hyunbok Lee<sup>c</sup>, and Sang Wan Cho<sup>a,\*</sup>

<sup>a</sup> Department of Physics, Yonsei University, 1 Yonseidae-gil, Wonju-si, Gangwon-do 26493  
Korea

<sup>b</sup> Institute of Physics and Applied Physics, Yonsei University, 50 Yonsei-ro, Seodaemun-Gu,  
Seoul 03722, Republic of Korea

<sup>c</sup> Department of Physics, Kangwon National University, 1 Gangwondaehak-gil, Chuncheon-si,  
Gaangwon-do 24341, Republic of Korea.

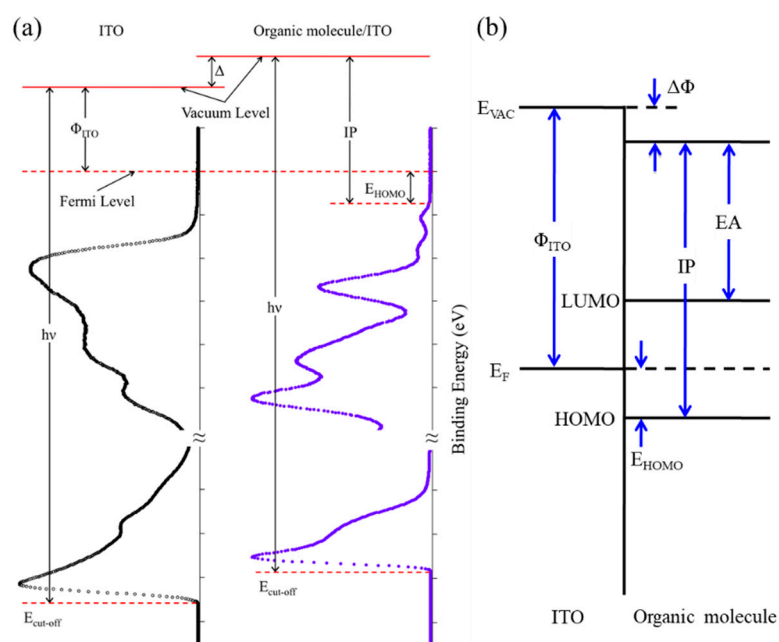

Figure S1. (a) Schematic illustration of some of the important parameters derived from PES characterization of surfaces and interfaces. (b) An energy-level diagram for a generic junction formed between an organic film and an ITO substrate.

Figure S1 illustrates the procedure used for the determination of energy-level alignment at the interface. The basic equation used in interpreting photoelectron spectra is:

$$E_B = h\nu - E_k - \Phi \quad (1)$$

The photon energy ( $h\nu$ ) is known and the photoelectron kinetic energy ( $E_k$ ) is measured in order to deduce the binding energy ( $E_B$ ) referenced to  $E_F$ . When  $h\nu$  is known, the work function ( $\Phi$ ) can be obtained from the measured energy of the secondary-electron cut-off ( $E_{\text{cut-off}}$ ), i.e.:

$$\Phi = h\nu - E_{\text{cut-off}} \quad (2)$$

The change in the work function,  $\Delta\Phi$ , can then be tracked by measuring  $E_{\text{cut-off}}$  after a deposition step. Therefore, the shift of this  $E_{\text{cut-off}}$  indicates the magnitude of the interfacial dipole, which is equal to increasing or decreasing the work function. Similarly, the ionization potential (IP) can be obtained from  $E_{\text{cut-off}}$  and the HOMO onset ( $E_{\text{HOMO}}$ ):

$$IP = h\nu - (E_{\text{cut-off}} - E_{\text{HOMO}}) \quad (3)$$
